# Supplementary material for: Adaptation of Archaeal Communities to Summer Hypoxia in the Sediment of Bohai Sea
Source: PubMed Central journal article supplement (PMC11707553; doi:10.1002/ece3.70768), 2025-01-08
Supplement: ECE3-15-e70768-s001.pdf [file ECE3-15-e70768-s001.pdf]

## Supplementary materials

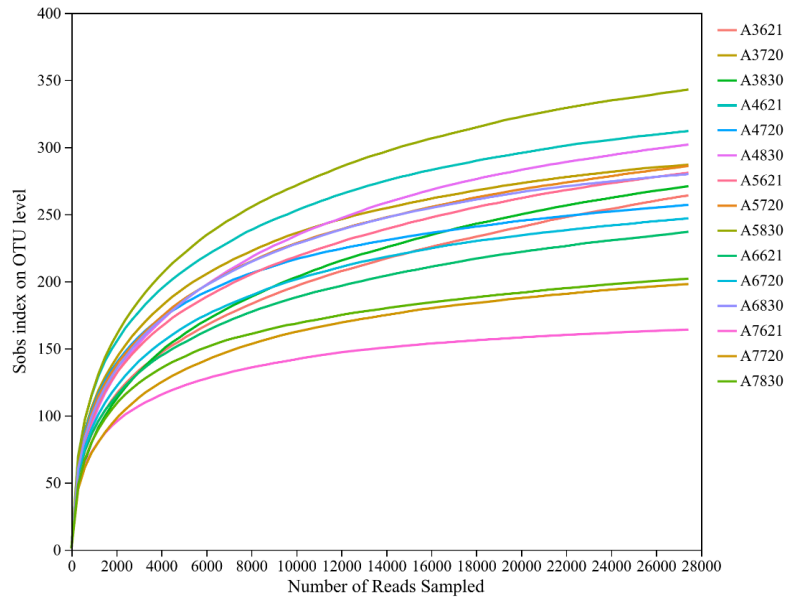

**FIGURE S1** Rarefaction curve of 16S rRNA from archaea in sediment.

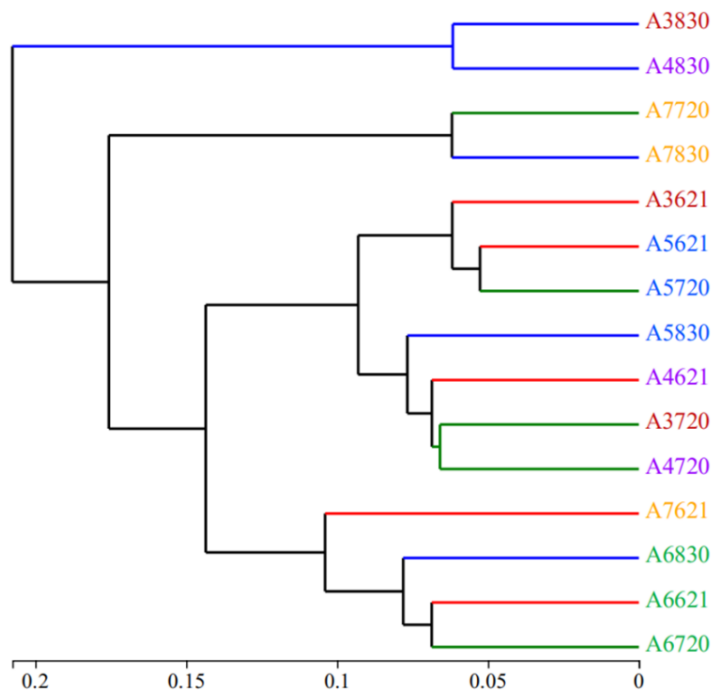

**FIGURE S2** Hierarchical cluster analysis of samples in Bohai Sea.

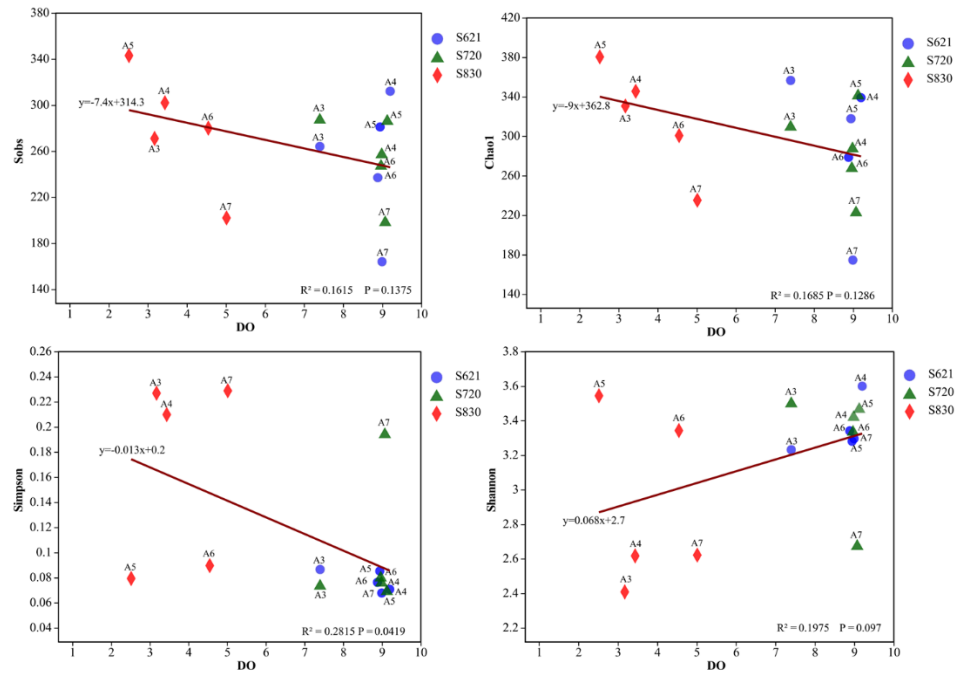

**FIGURE S3** Correlation analysis between archaea alpha diversity index and DO.

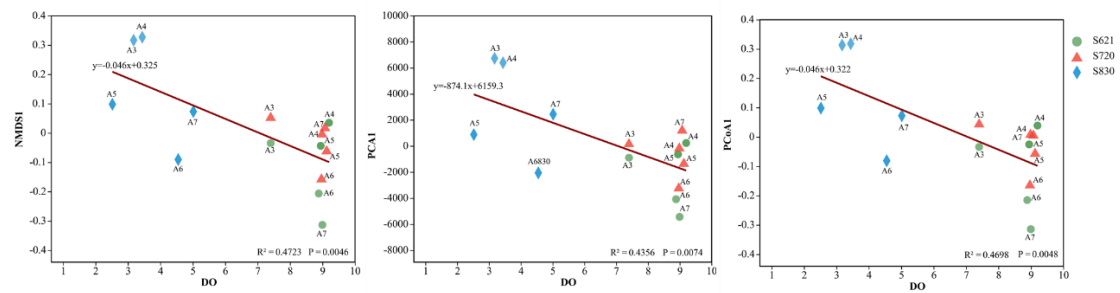

**FIGURE S4** Correlation analysis between archaea beta diversity index and DO.

**TABLE S1** Sample information collected from hypoxic zones in the Bohai Sea

| Time              | Sites | Location          | Sequence number | Depth(m) | Temperature(°C) | Salinity | DO(mg/L) | pH       | NO <sub>2</sub> <sup>-</sup> (mg/kg) | NO <sub>3</sub> <sup>-</sup> (mg/kg) | NH <sub>4</sub> <sup>+</sup> (mg/kg) |
|-------------------|-------|-------------------|-----------------|----------|-----------------|----------|----------|----------|--------------------------------------|--------------------------------------|--------------------------------------|
| 21, June, 2021    | A3    | 119.840E 39.6183N | 54278           | 18.16    | 13.26           | 32.03    | 7.40     | 7.98     | 0.21                                 | 1.04                                 | 5.02                                 |
|                   | A4    | 120.046E 39.5483N | 54328           | 21.23    | 11.34           | 32.12    | 9.20     | 8.19     | 0.30                                 | 0.86                                 | 4.83                                 |
|                   | A5    | 120.252E 39.4783N | 45364           | 22.90    | 11.50           | 32.43    | 8.95     | 7.85     | 0.28                                 | 1.41                                 | 13.49                                |
|                   | A6    | 120.458E 39.4083N | 45578           | 16.61    | 13.84           | 31.91    | 8.89     | 7.91     | 0.27                                 | 0.78                                 | 4.31                                 |
|                   | A7    | 120.551E 39.3765N | 49524           | 19.43    | 15.86           | 31.80    | 9.00     | 7.96     | 0.22                                 | 0.68                                 | 14.28                                |
| 20, July, 2021    | A3    | 119.840E 39.6183N | 48089           | 14.96    | 17.52           | 31.63    | 7.40     | 7.94     | 0.89                                 | 2.49                                 | 0.12                                 |
|                   | A4    | 120.046E 39.5483N | 41629           | 20.92    | 15.57           | 31.64    | 8.99     | 7.89     | 0.89                                 | 2.50                                 | 0.12                                 |
|                   | A5    | 120.252E 39.4783N | 49442           | 23.50    | 13.25           | 31.94    | 9.13     | 7.85     | 0.89                                 | 2.50                                 | 0.12                                 |
|                   | A6    | 120.458E 39.4083N | 50204           | 18.06    | 15.67           | 31.77    | 8.97     | 7.73     | 0.56                                 | 1.56                                 | 0.07                                 |
|                   | A7    | 120.551E 39.3765N | 49941           | 17.90    | 17.56           | 31.75    | 9.08     | 7.76     | 0.49                                 | 1.38                                 | 0.06                                 |
| 30, August, 2021  | A3    | 119.840E 39.6183N | 43756           | 16.97    | 20.77           | 31.31    | 3.18     | 7.84     | 2.58                                 | 17.33                                | 17.47                                |
|                   | A4    | 120.046E 39.5483N | 43283           | 20.35    | 19.12           | 31.64    | 3.44     | 7.81     | 2.39                                 | 6.42                                 | 6.26                                 |
|                   | A5    | 120.252E 39.4783N | 51626           | 22.88    | 19.26           | 31.34    | 2.52     | 7.75     | 2.36                                 | 3.87                                 | 7.21                                 |
|                   | A6    | 120.458E 39.4083N | 44617           | 17.43    | 23.68           | 30.84    | 4.55     | 8.07     | 2.36                                 | 6.67                                 | 7.04                                 |
|                   | A7    | 120.551E 39.3765N | 46579           | 19.54    | 24.00           | 30.86    | 5.02     | 8.12     | 2.57                                 | 1.75                                 | 7.19                                 |
| significance test |       |                   |                 | <i>p</i> | <i>p</i>        | <i>p</i> | <i>p</i> | <i>p</i> | <i>p</i>                             | <i>p</i>                             | <i>p</i>                             |
|                   |       | season            |                 | 0.94     | 0.00            | 0.00     | 0.00     | 0.26     | 0.00                                 | 0.03                                 | 0.00                                 |
|                   |       | station           |                 | 0.00     | 0.71            | 0.76     | 0.96     | 0.77     | 1.00                                 | 0.63                                 | 0.89                                 |

**TABLE S2** VIF of sedimentary physicochemical parameters

| Physical and<br>chemical<br>parameters | Depth | Salinity | DO   | pH   | NO <sub>3</sub> <sup>-</sup> | NH <sub>4</sub> <sup>+</sup> |
|----------------------------------------|-------|----------|------|------|------------------------------|------------------------------|
| VIF value                              | 1.28  | 2.84     | 3.59 | 1.33 | 2.60                         | 1.76                         |

$VIF_i = 1/(1-R_i^2)$  .  $R_i$  is the Multiple Correlation Coefficient of the independent variable  $x_i$  for regression analysis of the other independent variables.

**TABLE S3** Spearman correlation analysis between physicochemical parameters and abundance of 16S rRNA genes, alpha diversity index, respectively.

|                                            | Depth | DO     | NH <sub>4</sub> <sup>+</sup> | NO <sub>2</sub> <sup>-</sup> | NO <sub>3</sub> <sup>-</sup> | pH    | Salinity | Temperature |
|--------------------------------------------|-------|--------|------------------------------|------------------------------|------------------------------|-------|----------|-------------|
| 16S rRNA gene abundance                    |       |        |                              |                              |                              |       |          |             |
| Archaea                                    | -0.03 | 0.32   | -0.34                        | -0.13                        | -0.30                        | 0.12  | 0.00     | 0.10        |
| Diversity indices                          |       |        |                              |                              |                              |       |          |             |
| Chao                                       | 0.40  | -0.36  | 0.19                         | 0.18                         | 0.42                         | -0.11 | 0.13     | -0.19       |
| Heip                                       | 0.01  | 0.54*  | -0.29                        | -0.54*                       | -0.51                        | 0.26  | 0.35     | -0.48       |
| Shannon                                    | 0.24  | 0.32   | -0.32                        | -0.20                        | -0.09                        | 0.19  | 0.18     | -0.39       |
| Shannoneven                                | 0.14  | 0.57*  | -0.24                        | -0.48                        | -0.44                        | 0.31  | 0.36     | -0.50       |
| Simpson                                    | -0.25 | -0.61* | 0.24                         | 0.51                         | 0.42                         | -0.18 | -0.50    | 0.63*       |
| Sobs                                       | 0.39  | -0.27  | 0.09                         | 0.29                         | 0.47                         | -0.08 | 0.01     | -0.14       |
| Relative abundance of total archaeal phyla |       |        |                              |                              |                              |       |          |             |
| Aenigmarchaeota                            | -0.09 | -0.25  | -0.09                        | 0.28                         | 0.14                         | 0.11  | -0.46    | 0.41        |
| Altiaarchaeota                             | -0.18 | -0.27  | -0.01                        | 0.18                         | 0.06                         | -0.08 | -0.38    | 0.43        |
| Asgardarchaeota                            | 0.13  | 0.64*  | -0.28                        | -0.57*                       | -0.48                        | -0.08 | 0.52*    | -0.52*      |
| Crenarchaeota                              | -0.38 | -0.23  | 0.26                         | 0.15                         | -0.06                        | 0.07  | -0.23    | 0.42        |
| Euryarchaeota                              | 0.09  | -0.38  | -0.06                        | 0.47                         | 0.60*                        | -0.38 | -0.24    | 0.09        |
| Hadarchaeota                               | 0.06  | -0.19  | 0.19                         | 0.37                         | 0.00                         | 0.37  | -0.37    | 0.43        |

|                     |      |       |       |       |        |       |       |        |
|---------------------|------|-------|-------|-------|--------|-------|-------|--------|
| Halobacterota       | 0.14 | 0.38  | -0.41 | -0.43 | -0.37  | 0.08  | 0.55* | -0.65* |
| Hydrothermarchaeota | 0.27 | -0.31 | 0.07  | 0.38  | 0.55*  | -0.12 | -0.13 | -0.05  |
| Iainarchaeota       | 0.47 | -0.15 | -0.14 | 0.20  | 0.48   | -0.26 | 0.06  | -0.25  |
| Micrarchaeota       | 0.10 | -0.48 | 0.07  | 0.48  | 0.70*  | -0.23 | -0.32 | 0.14   |
| Nanoarchaeota       | 0.15 | -0.39 | 0.22  | 0.33  | 0.55** | -0.15 | -0.06 | -0.03  |
| Thermoplasmatota    | 0.31 | -0.23 | -0.06 | 0.25  | 0.43   | -0.08 | -0.02 | -0.17  |
| Unclassified        | 0.31 | 0.18  | -0.05 | -0.41 | -0.20  | 0.19  | 0.42  | -0.49  |

\*Significantly correlated at 0.05 level. \*\* Significantly correlated at 0.01 level.

**TABLE S4** Topological properties of archaeal networks

| Kingdom | Phylum              | Class              | node id | degree | weight degree | closeness centrality | betweenness centrality | eigenvector centrality |
|---------|---------------------|--------------------|---------|--------|---------------|----------------------|------------------------|------------------------|
| Archaea | Crenarchaeota       | Bathyarchaeia      | OTU1    | 21     | 16.25         | 0.003                | 90.75                  | 0.55                   |
| Archaea | Crenarchaeota       | Bathyarchaeia      | OTU120  | 18     | 13.28         | 0.003                | 101.50                 | 0.42                   |
| Archaea | Crenarchaeota       | Bathyarchaeia      | OTU126  | 1      | 0.66          | 0.003                | 0.00                   | 0.00                   |
| Archaea | NA                  | NA                 | OTU138  | 9      | 6.40          | 0.003                | 85.00                  | 0.06                   |
| Archaea | Crenarchaeota       | Nitrososphaeria    | OTU150  | 31     | 23.82         | 0.003                | 104.50                 | 1.00                   |
| Archaea | Crenarchaeota       | Nitrososphaeria    | OTU181  | 22     | 16.66         | 0.003                | 110.00                 | 0.78                   |
| Archaea | Crenarchaeota       | Nitrososphaeria    | OTU200  | 13     | 9.38          | 0.003                | 127.33                 | 0.10                   |
| Archaea | Crenarchaeota       | Nitrososphaeria    | OTU227  | 0      | 0.00          | 0.000                | 0.00                   | 0.01                   |
| Archaea | Thermoplasmatota    | Thermoplasmata     | OTU229  | 8      | 6.12          | 0.003                | 8.00                   | 0.16                   |
| Archaea | Crenarchaeota       | Bathyarchaeia      | OTU232  | 17     | 14.01         | 0.003                | 2.00                   | 0.57                   |
| Archaea | Crenarchaeota       | Bathyarchaeia      | OTU233  | 9      | 6.59          | 0.003                | 49.25                  | 0.12                   |
| Archaea | Thermoplasmatota    | Thermoplasmata     | OTU234  | 20     | 15.83         | 0.003                | 25.00                  | 0.72                   |
| Archaea | Asgardarchaeota     | Odinarchaeia       | OTU236  | 8      | 5.92          | 0.003                | 4.25                   | 0.27                   |
| Archaea | Thermoplasmatota    | NA                 | OTU238  | 17     | 12.70         | 0.003                | 44.00                  | 0.60                   |
| Archaea | Crenarchaeota       | Bathyarchaeia      | OTU239  | 3      | 2.15          | 0.003                | 0.00                   | 0.04                   |
| Archaea | Crenarchaeota       | Bathyarchaeia      | OTU243  | 26     | 19.20         | 0.003                | 178.00                 | 0.83                   |
| Archaea | Crenarchaeota       | Nitrososphaeria    | OTU246  | 11     | 7.52          | 0.003                | 87.00                  | 0.30                   |
| Archaea | Thermoplasmatota    | Thermoplasmata     | OTU248  | 16     | 12.37         | 0.003                | 34.50                  | 0.58                   |
| Archaea | Crenarchaeota       | Bathyarchaeia      | OTU252  | 7      | 5.23          | 0.003                | 19.00                  | 0.04                   |
| Archaea | Crenarchaeota       | Bathyarchaeia      | OTU266  | 10     | 6.91          | 0.003                | 57.67                  | 0.22                   |
| Archaea | Asgardarchaeota     | Heimdallarchaeia   | OTU268  | 16     | 11.90         | 0.003                | 15.00                  | 0.58                   |
| Archaea | Thermoplasmatota    | Thermoplasmata     | OTU273  | 14     | 11.00         | 0.003                | 4.00                   | 0.44                   |
| Archaea | NA                  | NA                 | OTU274  | 3      | 2.04          | 0.003                | 24.00                  | 0.06                   |
| Archaea | Thermoplasmatota    | Thermoplasmata     | OTU275  | 18     | 13.86         | 0.003                | 32.00                  | 0.63                   |
| Archaea | Crenarchaeota       | Bathyarchaeia      | OTU277  | 8      | 5.87          | 0.003                | 14.25                  | 0.04                   |
| Archaea | Hydrothermarchaeota | Hydrothermarchaeia | OTU280  | 22     | 17.36         | 0.003                | 118.00                 | 0.80                   |
| Archaea | Crenarchaeota       | Nitrososphaeria    | OTU286  | 12     | 9.34          | 0.003                | 23.00                  | 0.49                   |

|         |                 |                 |        |    |       |       |        |      |
|---------|-----------------|-----------------|--------|----|-------|-------|--------|------|
| Archaea | Crenarchaeota   | Bathyarchaeia   | OTU287 | 5  | 3.35  | 0.003 | 80.00  | 0.02 |
| Archaea | Thermoplasmata  | Thermoplasmata  | OTU293 | 8  | 6.21  | 0.003 | 0.00   | 0.31 |
| Archaea | Crenarchaeota   | Bathyarchaeia   | OTU299 | 0  | 0.00  | 0.000 | 0.00   | 0.01 |
| Archaea | Crenarchaeota   | Bathyarchaeia   | OTU302 | 1  | 0.68  | 0.003 | 0.00   | 0.01 |
| Archaea | Crenarchaeota   | Bathyarchaeia   | OTU309 | 15 | 10.73 | 0.003 | 61.08  | 0.44 |
| Archaea | Crenarchaeota   | Bathyarchaeia   | OTU33  | 8  | 5.64  | 0.003 | 40.00  | 0.10 |
| Archaea | Thermoplasmata  | Thermoplasmata  | OTU339 | 9  | 7.19  | 0.003 | 6.00   | 0.24 |
| Archaea | Crenarchaeota   | Bathyarchaeia   | OTU35  | 8  | 5.67  | 0.003 | 48.00  | 0.13 |
| Archaea | Crenarchaeota   | Bathyarchaeia   | OTU352 | 14 | 10.46 | 0.003 | 75.00  | 0.15 |
| Archaea | Crenarchaeota   | Bathyarchaeia   | OTU363 | 6  | 4.49  | 0.003 | 20.00  | 0.08 |
| Archaea | Asgardarchaeota | Lokiarchaeia    | OTU370 | 10 | 7.51  | 0.003 | 10.00  | 0.17 |
| Archaea | Crenarchaeota   | Bathyarchaeia   | OTU38  | 16 | 12.33 | 0.003 | 28.00  | 0.50 |
| Archaea | Crenarchaeota   | Bathyarchaeia   | OTU4   | 18 | 14.32 | 0.003 | 63.00  | 0.54 |
| Archaea | Crenarchaeota   | Nitrososphaeria | OTU402 | 6  | 4.18  | 0.003 | 66.00  | 0.19 |
| Archaea | Crenarchaeota   | Bathyarchaeia   | OTU413 | 15 | 11.29 | 0.003 | 58.00  | 0.21 |
| Archaea | Crenarchaeota   | Bathyarchaeia   | OTU415 | 12 | 8.49  | 0.003 | 186.50 | 0.09 |
| Archaea | Thermoplasmata  | Thermoplasmata  | OTU420 | 17 | 13.17 | 0.003 | 18.00  | 0.57 |
| Archaea | Crenarchaeota   | Bathyarchaeia   | OTU428 | 9  | 6.63  | 0.003 | 54.67  | 0.14 |
| Archaea | NA              | NA              | OTU433 | 1  | 0.66  | 0.003 | 0.00   | 0.00 |
| Archaea | Asgardarchaeota | Lokiarchaeia    | OTU443 | 15 | 11.57 | 0.003 | 47.00  | 0.50 |
| Archaea | Crenarchaeota   | Bathyarchaeia   | OTU45  | 4  | 2.72  | 0.003 | 75.00  | 0.02 |
| Archaea | Thermoplasmata  | Thermoplasmata  | OTU455 | 20 | 16.16 | 0.003 | 28.00  | 0.73 |
| Archaea | Thermoplasmata  | Thermoplasmata  | OTU473 | 19 | 15.10 | 0.003 | 52.00  | 0.66 |
| Archaea | Crenarchaeota   | Nitrososphaeria | OTU481 | 18 | 13.53 | 0.003 | 25.50  | 0.66 |
| Archaea | Crenarchaeota   | Bathyarchaeia   | OTU506 | 19 | 14.51 | 0.003 | 80.50  | 0.48 |
| Archaea | NA              | NA              | OTU516 | 6  | 4.23  | 0.003 | 19.00  | 0.13 |
| Archaea | Crenarchaeota   | Bathyarchaeia   | OTU517 | 20 | 15.22 | 0.003 | 78.00  | 0.55 |
| Archaea | Crenarchaeota   | Bathyarchaeia   | OTU522 | 18 | 13.77 | 0.003 | 141.50 | 0.50 |
| Archaea | Crenarchaeota   | Bathyarchaeia   | OTU526 | 11 | 8.26  | 0.003 | 30.00  | 0.28 |
| Archaea | Halobacterota   | Methanosarcinia | OTU53  | 2  | 1.46  | 0.003 | 0.00   | 0.01 |
| Archaea | Asgardarchaeota | Lokiarchaeia    | OTU534 | 18 | 14.39 | 0.003 | 41.25  | 0.61 |
| Archaea | Asgardarchaeota | Odinarchaeia    | OTU539 | 12 | 8.69  | 0.003 | 12.00  | 0.30 |
| Archaea | NA              | NA              | OTU550 | 10 | 7.29  | 0.003 | 58.00  | 0.21 |
| Archaea | Crenarchaeota   | Bathyarchaeia   | OTU556 | 0  | 0.00  | 0.000 | 0.00   | 0.01 |
| Archaea | Asgardarchaeota | Lokiarchaeia    | OTU566 | 15 | 10.97 | 0.003 | 67.42  | 0.46 |
| Archaea | NA              | NA              | OTU582 | 3  | 2.11  | 0.003 | 25.00  | 0.02 |
| Archaea | Crenarchaeota   | Bathyarchaeia   | OTU585 | 12 | 8.80  | 0.003 | 67.00  | 0.06 |
| Archaea | Crenarchaeota   | Bathyarchaeia   | OTU6   | 14 | 10.06 | 0.003 | 71.58  | 0.30 |
| Archaea | NA              | NA              | OTU69  | 11 | 8.14  | 0.003 | 34.00  | 0.33 |
| Archaea | Crenarchaeota   | Bathyarchaeia   | OTU77  | 2  | 1.36  | 0.003 | 0.00   | 0.05 |
| Archaea | Crenarchaeota   | Bathyarchaeia   | OTU81  | 18 | 13.47 | 0.003 | 49.00  | 0.64 |
| Archaea | Crenarchaeota   | Bathyarchaeia   | OTU86  | 2  | 1.29  | 0.003 | 1.00   | 0.04 |
| Archaea | Crenarchaeota   | Bathyarchaeia   | OTU87  | 4  | 2.75  | 0.003 | 1.50   | 0.01 |
| Archaea | Crenarchaeota   | Bathyarchaeia   | OTU96  | 19 | 15.01 | 0.003 | 22.50  | 0.46 |
